1 **Hepatitis B virus infection status and associated factors among health care**  
2 **workers in selected hospitals in Kisumu County, Kenya: a cross-sectional**  
3 **study.**

4 **Authors Name:**

5 Frankline Otieno Mboya <sup>1</sup>, Ibrahim I. Daud <sup>1</sup>, Raphael Ondondo <sup>2</sup>, Daniel Onguru <sup>1</sup>

6 **Target journal: Plos Global Public Health.**

7 **Authors institutional address:**

8 <sup>1</sup> Jaramogi Oginga Odinga University of Science and Technology.

9 P.O. Box 210-40601, Bondo- Kenya.

10 P.O. Box Nairobi-Kenya.

11 <sup>2</sup> Masinde Muliro University of Science and Technology, Kakamega Kenya

12 P.O. Box 190-50100, Kakamega- Kenya.

13

14 **Corresponding author:**

15 Frankline Otieno Mboya

16 Jaramogi Oginga Odinga University of Science and Technology.

17 Tel: +254720304739

18 Email: [otifrankline@gmail.com](mailto:otifrankline@gmail.com)

19

20

21

22

23

24

25

26

27

28

29

30

31

32

33

34

35

36

37

NOTE: This preprint reports new research that has not been certified by peer review and should not be used to guide clinical practice.

38

39 **Abstract (293)**

40 **Background:** Poorly managed medical waste produced at the health facilities are potential  
41 source of infections including occupational exposure to Hepatitis B Virus (HBV). This study  
42 evaluated the prevalence of HBV infection among healthcare workers (HCW) in Kisumu  
43 County.

44 **Methods:** We determined the prevalence of HBV infections among 192 HCW from nine  
45 purposively selected high volume public hospitals in Kisumu County. A structured  
46 questionnaire was administered, and 4.0 ml of venous blood sample collected for Hepatitis B  
47 surface antigen (HBsAg), hepatitis B surface antibody (anti-HBs) and total hepatitis B core  
48 antibody (anti-HBc) testing using enzyme immunoassay (EIA).

49 **Results:** Of the 192 HCW sampled, 52.1% were males and 78.7% are married, the median  
50 participants age was 34.4 years with interquartile range (IQR) of 11 years. Most participants  
51 had between 1-5 years of service while 43.8% had  $\geq 2$  doses of HBV vaccine.

52 The respective prevalence of HBsAg, anti HBs and anti HBc was 18.8% (95% CI: 13.5-25.0%),  
53 63.0% (95% CI: 55.8-69.9%) and 44.8% (95% CI: 37.6-52.1%). Higher proportion of HBV  
54 positive was found in HCW who had worked for less than one year and who had not received  
55 any dose of HBV vaccine at 37.5% and 35.9 % respectively.. Significant risk of HBV lifetime  
56 exposure was noted among HCW with one vaccine dose, those with no known exposure and  
57 highest in those with knowledge on HBV transmission (aOR, 7.97; 95% CI, 2.10-153.3, p-  
58 value=0.008). HCW who had received  $\geq 2$  doses of HBV vaccine (aOR, 0.03; 95% CI, 0.01-  
59 0.10, p-value= <0.0001) had significant HBV protection. Duration of service was not  
60 associated with HBV among HCW.

61 **Conclusion:** Prevalence of HBV infection was high among HCW in Kisumu County . Ministry  
62 of health Kenya should strengthen comprehensive infection prevention and control practices to  
63 reduce lifetime exposure to HBV infection among HCW.

64 **Key words:** Hepatitis B virus infection, Health care workers, HBV Vaccine

65 **Background:**

66 Globally, it is estimated that 257 million people are living with chronic hepatitis B (CHB) viral  
67 infection, HBV epidemic mostly affects WHO African and Western Pacific Regions (1).  
68 Prevalence of HBV infection in Africa is averagely more than 10% while pooled HBV  
69 prevalence in HCW was 6.81% (95% CI 5.67–7.95) classifying the region as one of high  
70 endemic area (2-5). In 2007, the Prevalence of HBV infection in Kenya was estimated to be 2–  
71 5%, while 31% of the Kenyan population was found to have been previously exposed to HBV  
72 (6).  
73 Global mortality due to viral hepatitis was about 1.4 million in 2016 (7, 8), of those deaths  
74 approximately 47% were due to HBV infection (9). HBV is highly infectious and is mainly  
75 transmitted through vertical transmission, percutaneous blood, sexual and body fluid  
76 contacts(10). Health care services in hospitals is aimed at restoring health and saving lives (11),  
77 these services also generate infectious medical waste that if poorly managed could be potential  
78 source for hospital acquired infections (HAI) which include HBV (12). The risk of HAI  
79 increases when basic infection prevention and control (IPC) practices in health care settings  
80 are not well laid out and adhered to. There is limited data on occupational exposure to HBV  
81 infection and its prevalence among HCW in Kenya. This study estimated the prevalence of  
82 HBV infection and exposures among HCW in Kisumu County.

## 83 **Methods**

### 84 **Study aim, design, and setting**

85 We conducted descriptive cross-sectional study between May 2020 and April 2021 to estimate  
86 HBV infection prevalence and risk factors among HCW in nine largest public hospitals in  
87 Kisumu County. These hospitals provide primary and referral medical care services, trainings,  
88 and have different structural establishments depending on the hospital level. The hospitals  
89 generate varying nature and type of medical waste depending on their capacity and medical  
90 services/procedure offered.

### 91 **Study population and characteristic of the participants**

92 A total of 192 HCW (nursing officers, medical officers, clinical officers, medical laboratory  
93 technologists, medical waste handlers, HIV testing counsellors, and mortuary technicians)  
94 were included in the study. Probability proportional to size (PPS) sampling was used to identify  
95 number of participants in each selected health facility and service delivery points, simple  
96 random sampling from duty roster was used to sample the participants.

### 97 **Data collection and Laboratory Procedures**

98 A structured questionnaires was administered to collect sociodemographic data after obtaining  
99 informed consent. 4.0 ml of venous blood sample was collected in ethylene-diamine-tetra-  
100 acetic acid (EDTA) (Becton, Dickinson and Company, Franklin Lakes, New Jersey, USA) for  
101 evaluating HBV infection based on three biomarkers: hepatitis B surface antigen (HBsAg),  
102 antibodies against hepatitis B surface antigen (anti-HBs), and antibodies against total hepatitis  
103 B core antigen (anti-HBc). Current HBV infection was determined by testing for HBsAg using  
104 Murex HBsAg version 3 kit; immunity to HBV infection was established by testing for anti-  
105 HBs using ETI-AB-AUK-3 Diasorin anti-HBs EIA kit; and past exposure to HBV infection  
106 was assessed by testing for anti-HBc using Murex anti-HBc (total) kit. All tests were done as

107 per the manufacturers' kit instructions without modifications. HBV current infection was  
108 defined as individual's blood is serologically positive for HBsAg while HBV lifetime exposure  
109 are individuals whose blood is serologically positive for either HBsAg (current infection) or  
110 anti-HBc (may indicate a current or past resolved infection).

## 111 **Data analysis**

112 Data was analysed using SPSS version 16.0 (SPSS Inc., Chicago, IL, USA). Results were  
113 summarized using descriptive statistics. Logistic regression models were used for bivariate and  
114 presented as odd ratios (OR) with 95% confidence intervals (CI). Multivariable analyses were  
115 performed for factors attaining p-values  $\leq 0.2$  in bivariate analysis to determine independent  
116 factors associated with HBV infection (positive for HBsAg or anti-HBc) among HCWs and  
117 presented as adjusted OR (aOR). A threshold p-value of less than 0.05 was considered  
118 statistically significant. The models were adjusted for age and gender.

## 119 **Ethical considerations**

120 The study received ethical approval from JOOTRH ethics review board  
121 IERC/JOOTRH/244/20 and National Commission for Science, Technology & Innovation  
122 (NACOSTI) granted research permit to conduct the study (licence no: NACOSTI/P/20/6300).  
123 Permissions to collect data from hospitals within Kisumu County was granted by Kisumu  
124 County Director of Health. All HBV susceptible HCW were referred for HBV vaccination  
125 through Kenya Expanded program for immunization (KEPI).

## 126 **Results**

### 127 **Sociodemographic characteristic of HCW**

128 Of the 192 HCW sampled, 52.1% were males and 78.7% are married, the median participants  
129 age was 34.4 years with interquartile range (IQR) of 11 years. Most participants had between  
130 1-5 years of service. Varied results were observed in HCW IPC training and capacity  
131 building: while capacity building on personal protective equipment (PPE) usage was 73.4%,  
132 trainings on waste management was 30.2% and infectious agents found on waste was 32.3%.

133 There was moderate knowledge on HBsAg transmission, prevention/control and waste  
 134 disposal at 56.8%, 53.7% and 30.2% respectively. HBV vaccine completion rate was low at  
 135 43.8% of HCW receiving  $\geq 2$  vaccine doses while 40.6% being susceptible to HBV infection.  
 136 Whereas 90.6% of health care workers agreed that PPEs are generally available within the  
 137 work settings, 77.6% felt that they were inadequate. There was low daily usage of PPEs:  
 138 Apron/dust coat 65.1%, gumboots (waste handlers) 13.5%, gloves 44.8% and mask wearing  
 139 while on duty 56.3%. There was good access to hand hygiene 96.4% and availability of waste  
 140 management bins (black, yellow, red) 95.8% with low waste segregation at 29.7% while 67.2  
 141 % of waste were incinerated at site or networked to facilities with incinerator. Higher  
 142 proportion (53.1%) of HCW had either contact or needle stick injury exposure (Table 1).

143  
 144 **Table1: Socio-demographic characteristics and risk factors of the study population (N=**  
 145 **192)**

| <b>Variables</b>                | <b>Frequency</b> | <b>Percent (%)</b> |
|---------------------------------|------------------|--------------------|
| <b>Sex</b>                      |                  |                    |
| Female                          | 92               | 47.92              |
| Male                            | 100              | 52.08              |
| <b>Age (years)</b>              |                  |                    |
| 20-29                           | 65               | 33.85              |
| 30-39                           | 83               | 43.23              |
| 40-49                           | 23               | 11.98              |
| $\geq 50$                       | 21               | 10.94              |
| <b>Marital status</b>           |                  |                    |
| Single                          | 37               | 19.27              |
| Married                         | 151              | 78.65              |
| Widowed/Separated/Divorced      | 4                | 2.08               |
| <b>Years of service (years)</b> |                  |                    |
| Less than 1                     | 8                | 4.17               |
| 1-5                             | 85               | 44                 |
| 6-10                            | 51               | 26.56              |
| >10                             | 48               | 25                 |
| <b>Cadre</b>                    |                  |                    |
| Doctors                         | 8                | 4.17               |
| Clinical Officer                | 29               | 15.1               |
| Nursing officer                 | 39               | 20.31              |
| Laboratory technologist         | 55               | 28.65              |
| Mortuary attendance             | 7                | 3.65               |
| HIV testing counsellor          | 17               | 8.85               |
| Medical waste handlers          | 37               | 19.27              |
| <b>HBV Vaccine uptake</b>       |                  |                    |

|                                                          |                     |     |      |
|----------------------------------------------------------|---------------------|-----|------|
|                                                          | ≥2 doses            | 84  | 43.8 |
|                                                          | 1 dose              | 30  | 15.6 |
|                                                          | Not vaccinated      | 78  | 40.6 |
| <b>History of exposure</b>                               |                     |     |      |
|                                                          | Needle Stick Injury | 91  | 47.4 |
|                                                          | Contact Exposure    | 11  | 5.7  |
|                                                          | No Known Exposure   | 90  | 46.9 |
| <b>History of Blood transfusion</b>                      |                     |     |      |
|                                                          | No                  | 189 | 98.4 |
|                                                          | Yes                 | 3   | 1.6  |
| <b>Knowledge on HBsAg Transmission</b>                   |                     |     |      |
|                                                          | No                  | 83  | 43.2 |
|                                                          | Yes                 | 109 | 56.8 |
| <b>Knowledge on HBsAg Prevention and control</b>         |                     |     |      |
|                                                          | No                  | 89  | 46.4 |
|                                                          | Yes                 | 103 | 53.7 |
| <b>Training on PPE full module</b>                       |                     |     |      |
|                                                          | No                  | 141 | 26.6 |
|                                                          | Yes                 | 51  | 73.4 |
| <b>Training on infectious agent on waste full module</b> |                     |     |      |
|                                                          | No                  | 130 | 67.7 |
|                                                          | Yes                 | 62  | 32.3 |
| <b>Training on waste management full module</b>          |                     |     |      |
|                                                          | No                  | 134 | 69.8 |
|                                                          | Yes                 | 58  | 30.2 |
| <b>Knowledge on waste disposal</b>                       |                     |     |      |
|                                                          | No                  | 90  | 46.9 |
|                                                          | Yes                 | 102 | 53.1 |
| <b>Availability of PPEs</b>                              |                     |     |      |
|                                                          | No                  | 18  | 9.4  |
|                                                          | Yes                 | 174 | 90.6 |
| <b>Adequacy of PPEs</b>                                  |                     |     |      |
|                                                          | No                  | 149 | 77.6 |
|                                                          | Yes                 | 43  | 22.4 |
| <b>Daily use of apron/Dust coat</b>                      |                     |     |      |
|                                                          | No                  | 67  | 34.9 |
|                                                          | Yes                 | 125 | 65.1 |
| <b>Daily use of gumboots (Waste handlers only)</b>       |                     |     |      |
|                                                          | No                  | 32  | 86.5 |
|                                                          | Yes                 | 5   | 13.5 |
| <b>Daily use of gloves</b>                               |                     |     |      |

|                                                                      |     |     |      |
|----------------------------------------------------------------------|-----|-----|------|
|                                                                      | No  | 106 | 55.2 |
|                                                                      | Yes | 86  | 44.8 |
| <b>Daily use of mask when on duty</b>                                |     |     |      |
|                                                                      | No  | 84  | 43.8 |
|                                                                      | Yes | 108 | 56.3 |
| <b>Access to hand hygiene</b>                                        |     |     |      |
|                                                                      | No  | 7   | 3.7  |
|                                                                      | Yes | 185 | 96.4 |
| <b>Availability of waste management materials (All 3 waste bins)</b> |     |     |      |
|                                                                      | No  | 8   | 4.2  |
|                                                                      | Yes | 184 | 95.8 |
| <b>Proper waste segregation</b>                                      |     |     |      |
|                                                                      | No  | 135 | 70.3 |
|                                                                      | Yes | 57  | 29.7 |
| <b>Waste disposal Method (Incineration)</b>                          |     |     |      |
|                                                                      | No  | 63  | 32.8 |
|                                                                      | Yes | 129 | 67.2 |

146 Values are presented as numbers and (%).

#### 147 **Prevalence of HBV Biomarkers among HCW in Kisumu County, 2020 (N= 192)**

148 In table 2 below, the respective prevalence of HBsAg, anti HBs and anti HbC was 18.8% (95%  
149 CI: 13.5-25.0%), 63.0% (95% CI: 55.8-69.9%) and 44.8% (95% CI: 37.6-52.1%) respectively.  
150 Highest prevalence of HBsAg was seen among, HCW who had worked for less than one year  
151 37.5% (95% CI: 8.5-75.5), HBV unvaccinated HCW 35.9% (95% CI: 25.3-47.6), HCW who  
152 has had blood transfusion 33.3% (95% CI: 0.84-90.6) and HIV testing counselors 29.4% (95%  
153 CI: 10.3-56).

154 Anti HbC prevalence was highest among HCW with one dose of HBV vaccine 83.3% (95%  
155 CI: 65.3-94.4), those with less than one year in service 75.0% (95% CI: 34.9-96.8), waste  
156 handlers not using gumboots 68.8% (95% CI: 50.0-83.9) and HBV unvaccinated HCW 66.7%  
157 (95% CI: 55.1-76.9).

158 There is moderate HBV immunity or recovery level among HCW, the carders with highest anti  
159 HBs positivity were laboratory scientist 74.6% (95% CI: 61.0-85.3), clinical officers 65.5%  
160 (95% CI:45.7-82.1) and Nursing officers 64.1% (95% CI: 47.2-78.8). HTS counselors had the  
161 lowest immunity or recovery level at 35.3% (95% CI: 14.2-61.7).

162 **Table 2: Prevalence of hepatitis B virus markers among HCW in Kisumu County, 2020**  
163 **(N= 192)**

| Characteristic | Prevalence of HBsAg Biomarker | Prevalence of Anti-HBs Biomarker | Prevalence of Anti-HbC Biomarker |
|----------------|-------------------------------|----------------------------------|----------------------------------|
|----------------|-------------------------------|----------------------------------|----------------------------------|



|                                | N(%)   | % (95%CI)       | N(%)    | % (95%CI)       | N(%)   | % (95%CI)       |
|--------------------------------|--------|-----------------|---------|-----------------|--------|-----------------|
| <b>Overall</b>                 | 36/192 | 18.8(13.5-25.0) | 121/192 | 63.0(55.8-69.9) | 86/192 | 44.8(37.6-52.1) |
| <b>Carder</b>                  |        |                 |         |                 |        |                 |
| Doctors                        | 2/8    | 25.0(3.19-65.1) | 5/8     | 62.5(24.5-91.5) | 3/8    | 37.5(8.5-75.5)  |
| Clinical Officer               | 6/29   | 20.7(8-39.7)    | 19/29   | 65.5(45.7-82.1) | 14/29  | 48.3(29.5-67.5) |
| Nursing officer                | 8/39   | 20.5(9.3-36.5)  | 25/39   | 64.1(47.2-78.8) | 15/39  | 38.5(23.4-55.4) |
| Laboratory technologist        | 7/55   | 12.7(5.3-24.5)  | 41/55   | 74.6(61.0-85.3) | 18/55  | 32.7(20.7-46.7) |
| Mortuary attendance            | 0/7    | 0.0(0-41.0)     | 4/7     | 57.1(18.4-90.1) | 4/7    | 57.1(18.4-90.1) |
| HTS counsellor                 | 5/17   | 29.4(10.3-56)   | 6/17    | 35.3(14.2-61.7) | 8/17   | 47.1(23.0-72.2) |
| Waste handlers                 | 8/37   | 21.6(9.8-38.2)  | 21/37   | 56.8(39.5-72.9) | 24/37  | 64.9(47.5-79.8) |
| <b>Sex</b>                     |        |                 |         |                 |        |                 |
| Male                           | 12/100 | 12(6.4-20.0)    | 69/100  | 69.0(59.0-77.9) | 46/100 | 46.0(36.0-56.3) |
| Female                         | 24/92  | 26.1(17.5-36.3) | 52/92   | 56.5(45.8-66.8) | 40/92  | 43.5(33.2-54.2) |
| <b>Age(Years)</b>              |        |                 |         |                 |        |                 |
| 20-29                          | 10/65  | 15.4(7.6-26.5)  | 41/65   | 63.1(50.2-74.7) | 25/65  | 38.5(26.7-51.4) |
| 30-39                          | 15/83  | 18.1(10.5-28.1) | 56/83   | 67.5(56.3-77.4) | 35/83  | 42.2(31.4-53.5) |
| 40-49                          | 6/23   | 26.1(10.2-48.4) | 11/23   | 47.8(26.8-69.4) | 14/23  | 60.9(38.5-80.3) |
| ≥50                            | 5/21   | 23.8(8.2-47.2)  | 13/21   | 61.9(38.4-85.1) | 12/21  | 57.1(34.0-78.2) |
| <b>Marital status</b>          |        |                 |         |                 |        |                 |
| Single                         | 7/37   | 18.9(8.0-35.2)  | 20/37   | 54.1(36.9-70.5) | 15/37  | 40.5(24.8-57.9) |
| Married                        | 28/151 | 18.5(12.7-25.7) | 98/151  | 64.9(56.7-72.5) | 69/151 | 45.7(37.6-54.0) |
| Widowed/Separated/Divorced     | 1/4    | 25(0.6-80.6)    | 3/4     | 75.0(19.4-99.4) | 2/4    | 50.0(6.8-93.2)  |
| <b>Years of service(Years)</b> |        |                 |         |                 |        |                 |
| <1                             | 3/8    | 37.5(8.5-75.5)  | 4/8     | 50.0(15.7-84.3) | 6/8    | 75.0(34.9-96.8) |
| 1-5                            | 13/85  | 15.3(8.4-24.7)  | 51/85   | 60.0(48.8-70.5) | 31/85  | 36.5(26.3-47.6) |
| 6-10                           | 10/51  | 19.6(9.8-33.1)  | 38/51   | 74.5(60.4-85.7) | 26/51  | 51.0(36.6-65.3) |
| >10                            | 10/48  | 20.8(10.5-35.0) | 28/48   | 58.3(43.2-72.4) | 23/48  | 47.9(33.3-62.8) |
| <b>HBV Vaccine uptake</b>      |        |                 |         |                 |        |                 |

|                                                          |        |                  |         |                 |        |                 |
|----------------------------------------------------------|--------|------------------|---------|-----------------|--------|-----------------|
| 1 dose                                                   | 4/30   | 13.3(3.8-30.7)   | 20/30   | 66.7(47.2-82.7) | 25/30  | 83.3(65.3-94.4) |
| ≥2 doses                                                 | 4/84   | 4.8(1.31-11.8)   | 77/84   | 91.7(83.6-96.6) | 9/84   | 10.7(5.0-19.4)  |
| Not vaccinated                                           | 28/78  | 35.9(25.3-47.6)  | 24/78   | 30.8(20.8-42.2) | 52/78  | 66.7(55.1-76.9) |
| <b>History of exposure</b>                               |        |                  |         |                 |        |                 |
| Needle Stick Injury                                      | 8/91   | 8.8(3.9-16.6)    | 65/91   | 71.4(61.0-80.4) | 37/91  | 40.7(30.5-51.5) |
| Contact Exposure                                         | 0/11   | 0.0(0.0-28.5)    | 8/11    | 72.7(39.0-94.0) | 2/11   | 18.2(2.3-51.8)  |
| No Known Exposure                                        | 28/90  | 31.1 (21.8-41.7) | 48/90   | 53.3(42.5-63.9) | 47/90  | 52.2(41.4-62.9) |
| <b>Blood transfusion</b>                                 |        |                  |         |                 |        |                 |
| No                                                       | 35/189 | 18.5(13.3-24.8)  | 119/189 | 63.0(55.7-69.9) | 85/189 | 45.0(37.8-52.4) |
| Yes                                                      | 1/3    | 33.3(0.84-90.6)  | 2/3     | 66.7(9.4-99.2)  | 1/3    | 33.3(0.8-90.6)  |
| <b>Knowledge on HBsAg Transmission</b>                   |        |                  |         |                 |        |                 |
| No                                                       | 18/83  | 21.7(13.4-32.1)  | 40/83   | 48.2(37.1-59.4) | 43/83  | 51.8(40.6-62.9) |
| Yes                                                      | 18/109 | 16.5(10.1-24.8)  | 81/109  | 74.3(65.1-82.2) | 43/109 | 39.5(30.2-49.3) |
| <b>Knowledge on HBsAg Prevention and control</b>         |        |                  |         |                 |        |                 |
| No                                                       | 20/89  | 22.5(14.3-32.6)  | 45/89   | 50.6(39.8-61.3) | 46/89  | 51.7(40.8-62.4) |
| Yes                                                      | 16/103 | 15.5(9.2-24.0)   | 76/103  | 73.8(64.2-82.0) | 40/103 | 38.8(29.4-48.9) |
| <b>Training on PPE full module</b>                       |        |                  |         |                 |        |                 |
| No                                                       | 28/141 | 19.9(13.6-27.4)  | 81/141  | 57.5(48.9-65.7) | 65/141 | 46.1(37.7-54.7) |
| Yes                                                      | 8/51   | 15.7(7.0-28.6)   | 40/51   | 78.4(64.7-88.7) | 21/51  | 41.2(27.6-55.8) |
| <b>Training on infectious agent on waste full module</b> |        |                  |         |                 |        |                 |
| No                                                       | 28/130 | 21.5(14.8-29.6)  | 75/130  | 57.7(48.7-66.3) | 64/130 | 49.2(40.4-58.1) |
| Yes                                                      | 8/62   | 12.9(5.7-23.9)   | 46/62   | 74.2(61.5-84.5) | 22/62  | 35.5(23.7-48.7) |
| <b>Training on waste management full module</b>          |        |                  |         |                 |        |                 |
| No                                                       | 26/134 | 19.4(13.1-27.1)  | 80/134  | 59.7(50.9-68.1) | 65/134 | 48.5(39.8-57.3) |
| Yes                                                      | 10/58  | 17.2(8.6-29.4)   | 41/58   | 70.7(57.3-81.9) | 21/58  | 36.2(24.0-49.9) |
| <b>Knowledge on waste disposal</b>                       |        |                  |         |                 |        |                 |
| No                                                       | 21/90  | 23.3(15.1-33.4)  | 49/90   | 54.4(43.6-65.0) | 47/90  | 52.2(41.4-62.9) |

|                                                                      |     |        |                 |         |                 |        |                 |
|----------------------------------------------------------------------|-----|--------|-----------------|---------|-----------------|--------|-----------------|
|                                                                      | Yes | 15/102 | 14.7(8.5-23.1)  | 72/102  | 70.6(60.8-79.2) | 39/102 | 38.2(28.8-48.4) |
| <b>Availability of PPEs</b>                                          |     |        |                 |         |                 |        |                 |
|                                                                      | No  | 4/18   | 22.2(6.4-47.6)  | 8/18    | 44.4(21.5-69.2) | 7/18   | 38.9(17.3-64.3) |
|                                                                      | Yes | 32/174 | 18.4(12.9-25.0) | 113/174 | 64.9(57.4-72.0) | 79/174 | 45.4(37.9-53.1) |
| <b>Adequacy of PPEs</b>                                              |     |        |                 |         |                 |        |                 |
|                                                                      | No  | 31/149 | 20.8(14.6-28.2) | 89/149  | 59.7(51.4-67.7) | 74/149 | 49.6(41.4-58.0) |
|                                                                      | Yes | 5/43   | 11.6(3.9-25.1)  | 32/43   | 74.4(58.8-86.5) | 12/43  | 27.9(15.3-43.7) |
| <b>Daily use of apron/Dust coat</b>                                  |     |        |                 |         |                 |        |                 |
|                                                                      | No  | 16/67  | 23.9(14.3-35.9) | 38/67   | 56.7(44.0-68.8) | 37/67  | 55.2(42.6-67.4) |
|                                                                      | Yes | 20/125 | 16.0(10.1-23.6) | 83/125  | 66.4(57.4-74.6) | 49/125 | 39.2(30.6-48.3) |
| <b>Daily use of gumboots (Waste handlers only)</b>                   |     |        |                 |         |                 |        |                 |
|                                                                      | No  | 8/32   | 25.0(11.5-43.4) | 17/32   | 53.1(34.7-70.9) | 22/32  | 68.8(50.0-83.9) |
|                                                                      | Yes | 0/5    | 0.0(0.0-52.2)   | 4/5     | 80.0(28.4-99.5) | 2/5    | 8.3(5.3-85.3)   |
| <b>Daily use of gloves</b>                                           |     |        |                 |         |                 |        |                 |
|                                                                      | No  | 18/106 | 17.0(10.4-25.5) | 74/106  | 69.8(60.1-78.4) | 56/106 | 52.8(42.9-62.6) |
|                                                                      | Yes | 18/86  | 20.9(12.9-31.2) | 47/86   | 54.7(43.6-65.4) | 30/86  | 34.9(24.9-45.9) |
| <b>Daily use of mask when on duty</b>                                |     |        |                 |         |                 |        |                 |
|                                                                      | No  | 15/84  | 17.9(10.4-27.7) | 55/84   | 65.5(54.3-75.5) | 40/84  | 47.6(36.6-58.8) |
|                                                                      | Yes | 21/108 | 19.4(12.5-28.2) | 66/108  | 61.1(51.3-70.3) | 46/108 | 42.6(33.1-52.5) |
| <b>Access to hand hygiene</b>                                        |     |        |                 |         |                 |        |                 |
|                                                                      | No  | 2/7    | 28.6(3.7-71.0)  | 3/7     | 42.9(9.9-81.6)  | 3/7    | 42.9(9.9-81.6)  |
|                                                                      | Yes | 34/185 | 18.4(13.1-24.7) | 118/185 | 63.8(56.4-70.7) | 83/185 | 44.9(37.6-52.3) |
| <b>Availability of waste management materials (All 3 waste bins)</b> |     |        |                 |         |                 |        |                 |
|                                                                      | No  | 2/8    | 25.0(3.2-65.1)  | 4/8     | 50.0(15.7-84.3) | 4/8    | 50.0(15.7-84.3) |
|                                                                      | Yes | 34/184 | 18.5(13.2-24.9) | 117/184 | 63.6(56.2-70.5) | 82/184 | 44.6(37.3-52.1) |
| <b>Proper waste segregation</b>                                      |     |        |                 |         |                 |        |                 |
|                                                                      | No  | 28/135 | 20.7(14.3-28.6) | 79/135  | 58.5(49.7-66.9) | 66/135 | 48.9(40.2-57.6) |
|                                                                      | Yes | 8/57   | 14.0(6.3-25.8)  | 42/57   | 73.7(60.3-84.5) | 20/57  | 35.1(22.9-48.9) |

| Waste disposal Method (Incineration) |        |                 |        |                 |        |                 |  |
|--------------------------------------|--------|-----------------|--------|-----------------|--------|-----------------|--|
| No                                   | 10/63  | 15.9(7.9-27.3)  | 42/63  | 66.7(53.7-78.1) | 28/63  | 44.4(31.9-57.5) |  |
| Yes                                  | 26/129 | 20.2(13.6-28.1) | 79/129 | 61.2(52.3-69.7) | 58/129 | 45.0(36.2-54.0) |  |

164 Values are presented as number (%); CI, confidence interval; HBsAg, hepatitis B surface  
 165 antigen; Anti-HBc; hepatitis B core antibody; Anti-HCV, antibody hepatitis C virus.

166 **HBV infection by Vaccine uptake.**

167 The prevalence of HBV was highest among healthcare workers who had not received any dose  
 168 of HBV vaccine (at 35.9%), those who received one dose of HBV vaccination had a prevalence  
 169 of 13.3%, while those who received two or more doses of HBV vaccination had a prevalence  
 170 of 4.8% (Figure 1). Notably, none of the 69 HCWs who reported receiving all the three required  
 171 doses of HBV vaccination were detected with HBV infection.

172

173 **Figure 1: HBV infection by Vaccination status**

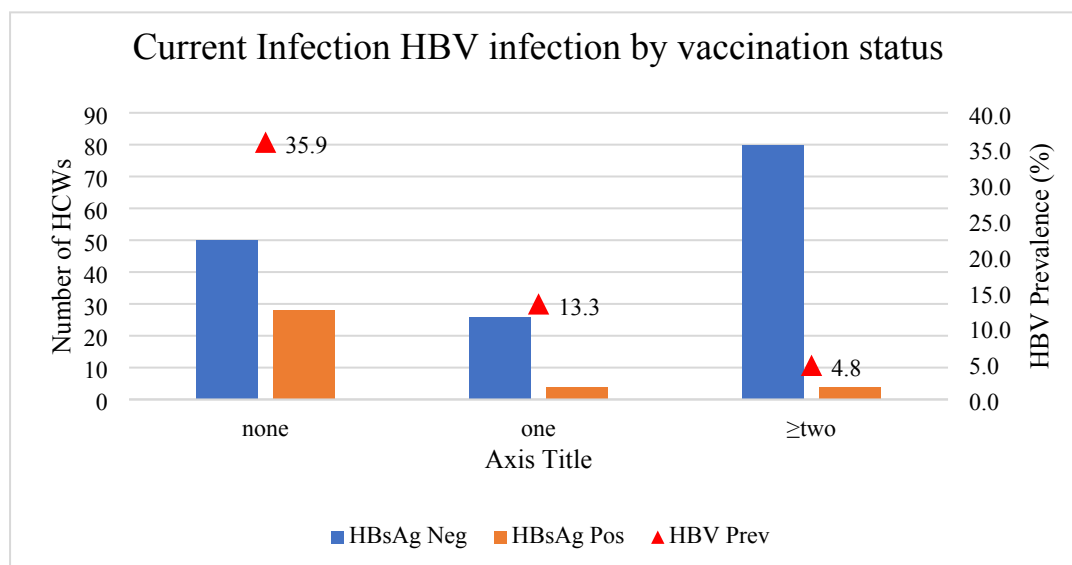

174

175

176

177

178

179

180

181

182

183 **Factors associated with Current HBV infection**

184  
 185 Table3 shows that female HCW were more likely to have current HBV infection compared to  
 186 their male counterparts (aOR, 3.22; 95% CI, 1.06-9.75, p-value< 0.05). Additionally, HCW  
 187 without a history of known exposure had increased odds of current HBV infection compared  
 188 to those with a previous needle stick injury (aOR, 5.37; 95% CI, 1.81-15.92, p-value< 0.001).  
 189 However, HCW who reported receiving  $\geq 2$  doses of HBV vaccination had reduced likelihood  
 190 of current HBV infection. (aOR, 0.05; 95% CI, 0.01-0.20, p-value <0.001) respectively. None  
 191 of the other sociodemographic characteristics were associated with current infection of HBV  
 192 among HCW.

193

194 **Table 3: Factors associated with current HBV infection among HCW in Kisumu**  
 195 **County.**

| <b>Table 3: Factors associated with current HBV infection among HCW in Kisumu County</b> |           |           |                 |         |                 |         |
|------------------------------------------------------------------------------------------|-----------|-----------|-----------------|---------|-----------------|---------|
| Characteristic                                                                           | HWC (%)   | N(%)      | OR (95% CI)     | p-value | aOR(95% CI)     | p-value |
| Overall                                                                                  | N(%)      | 36 (18.8) |                 |         |                 |         |
| <b>Cadre</b>                                                                             |           |           |                 |         |                 |         |
| Doctors                                                                                  | 8(4.2)    | 2(25.0)   | 1               |         |                 |         |
| Clinical Officer                                                                         | 29(15.1)  | 6(20.7)   | 0.78(0.12-4.90) | 0.793   |                 |         |
| Nursing officer                                                                          | 39(20.3)  | 8(20.5)   | 0.77(0.13-4.59) | 0.778   |                 |         |
| Laboratory technologist                                                                  | 55(28.7)  | 7(12.7)   | 0.44(0.07-2.61) | 0.364   |                 |         |
| Mortuary attendance                                                                      | 7(3.7)    | 0(0.0)    | -               |         |                 |         |
| HTS counsellor                                                                           | 17(9.9)   | 5(29.4)   | 1.25(0.19-8.44) | 0.819   |                 |         |
| Waste handlers                                                                           | 37(19.3)  | 8(21.6)   | 0.83(0.14-4.91) | 0.835   |                 |         |
| <b>Sex</b>                                                                               |           |           |                 |         |                 |         |
| Male                                                                                     | 92(47.9)  | 12(12.0)  | 1               |         | 1               |         |
| Female                                                                                   | 100(52.1) | 24(26.1)  | 2.59(1.21-5.54) | 0.014   | 3.22(1.06-9.75) | 0.039   |
| <b>Age(years)</b>                                                                        |           |           |                 |         |                 |         |
| 20-29                                                                                    | 65(33.9)  | 10(15.4)  | 1               |         |                 |         |
| 30-39                                                                                    | 83(43.2)  | 15(18.1)  | 1.21(0.51-2.91) | 0.665   |                 |         |
| 40-49                                                                                    | 23(12.0)  | 6(26.1)   | 1.94(0.62-6.12) | 0.258   |                 |         |

|                                                  |               |          |                      |             |                      |             |
|--------------------------------------------------|---------------|----------|----------------------|-------------|----------------------|-------------|
| ≥50                                              | 21(10.9)      | 5(23.8)  | 1.72(0.51<br>-5.76)  | 0.38        |                      |             |
| <b>Marital status</b>                            |               |          |                      |             |                      |             |
| Single                                           | 37(19.3)      | 7(18.9)  | 1                    |             |                      |             |
| Married                                          | 151(78.7<br>) | 28(18.5) | 0.98(0.39<br>-2.45)  | 0.958       |                      |             |
| Widowed/Separated/Divorced                       | 4(2.1)        | 1(25.0)  | 1.42(0.13<br>-15.87) | 0.772       |                      |             |
| <b>Years of service(years)</b>                   |               |          |                      |             |                      |             |
| <1                                               | 8(4.2)        | 3(37.5)  | 1                    |             | 1                    |             |
| 1-5                                              | 85(44.3)      | 13(15.3) | 0.30(0.06<br>-1.42)  | 0.128       | 0.56(0.08-<br>3.98)  | 0.56        |
| 6-10                                             | 51(26.6)      | 10(19.6) | 0.41(0.08<br>-1.99)  | 0.267       | 1.89(0.17-<br>21.55) | 0.607       |
| >10                                              | 48(25.0)      | 10(20.8) | 0.44(0.09<br>-2.15)  | 0.31        | 1.61(0.1-<br>25.91)  | 0.738       |
| <b>HBV Vaccine uptake</b>                        |               |          |                      |             |                      |             |
| Not vaccinated                                   | 78(40.6)      | 28(35.9) | 1                    |             | 1                    |             |
| 1 dose                                           | 30(15.6)      | 4(13.3)  | 0.27                 | 0.028       | 0.31(0.06-<br>1.54)  | 0.153       |
| ≥2 doses                                         | 84(43.8)      | 4(4.8)   | 0.09                 | <0.000<br>1 | 0.05(0.01-<br>0.20)  | <0.000<br>1 |
| <b>History of exposure</b>                       |               |          |                      |             |                      |             |
| Needle Stick Injury                              | 91(47.4)      | 8(8.8)   | 1                    |             | 1                    |             |
| Contact Exposure                                 | 11(5.7)       | 0(0.0)   | 1(-)                 |             | 1(-)                 |             |
| No Known Exposure                                | 90(46.9)      | 28(31.1) | 4.69(2.00<br>-10.98) | <0.001      | 5.37(1.81-<br>15.92) | <0.00<br>1  |
| <b>Blood transfusion</b>                         |               |          |                      |             |                      |             |
| No                                               | 189(98.4<br>) | 35(18.5) | 1                    |             |                      |             |
| Yes                                              | 3(1.6)        | 1(33.3)  | 2.20(0.19<br>-24.95) | 0.525       |                      |             |
| <b>Knowledge on HBsAg Transmission</b>           |               |          |                      |             |                      |             |
| No                                               | 83(43.2)      | 18(21.7) | 1                    |             |                      |             |
| Yes                                              | 109(56.8<br>) | 18(16.5) | 0.71(0.35<br>-1.48)  | 0.364       |                      |             |
| <b>Knowledge on HBsAg Prevention and control</b> |               |          |                      |             |                      |             |
| No                                               | 89(46.4)      | 20(22.5) | 1                    |             |                      |             |
| Yes                                              | 103(53.7<br>) | 16(15.5) | 0.63(0.31<br>-1.32)  | 0.222       |                      |             |
| <b>Training on PPE full module</b>               |               |          |                      |             |                      |             |
| No                                               | 141(26.6<br>) | 28(19.9) | 1                    |             |                      |             |

|                                                          |           |          |                     |       |                     |       |
|----------------------------------------------------------|-----------|----------|---------------------|-------|---------------------|-------|
| Yes                                                      | 51(73.4)  | 8(15.7)  | 0.75(0.32<br>-1.78) | 0.514 |                     |       |
| <b>Training on infectious agent on waste full module</b> |           |          |                     |       |                     |       |
| No                                                       | 130(67.7) | 28(21.5) | 1                   |       | 1                   |       |
| Yes                                                      | 62(32.3)  | 8(12.9)  | 0.54(0.23<br>-1.27) | 0.156 | 1.53(0.31-<br>7.57) | 0.604 |
| <b>Training on waste management full module</b>          |           |          |                     |       |                     |       |
| No                                                       | 134(69.8) | 26(19.4) | 1                   |       |                     |       |
| Yes                                                      | 58(30.2)  | 10(17.2) | 0.87(0.39<br>-1.93) | 0.725 |                     |       |
| <b>Knowledge on waste disposal</b>                       |           |          |                     |       |                     |       |
| No                                                       | 90(46.9)  | 21(23.3) | 1                   |       | 1                   |       |
| Yes                                                      | 102(53.1) | 15(14.7) | 0.57(0.27<br>-1.18) | 0.129 | 0.49(0.13-<br>1.86) | 0.297 |
| <b>Availability of PPEs</b>                              |           |          |                     |       |                     |       |
| No                                                       | 18(9.4)   | 4(22.2)  | 1                   |       |                     |       |
| Yes                                                      | 174(90.6) | 32(18.4) | 0.79(0.24<br>-2.56) | 0.692 |                     |       |
| <b>Adequacy of PPEs</b>                                  |           |          |                     |       |                     |       |
| No                                                       | 149(77.6) | 27(19.6) | 1                   |       | 1                   |       |
| Yes                                                      | 43(22.4)  | 5(11.6)  | 0.50(0.18<br>-1.38) | 0.181 | 0.47(0.13-<br>1.72) | 0.256 |
| <b>Daily use of apron/Dust coat</b>                      |           |          |                     |       |                     |       |
| No                                                       | 67(34.9)  | 16(23.9) | 1                   |       | 1                   |       |
| Yes                                                      | 125(65.1) | 20(16.0) | 0.61(0.29<br>-1.27) | 0.185 | 0.57(0.20-<br>1.64) | 0.297 |
| <b>Daily use of gumboots (Waste handlers only)</b>       |           |          |                     |       |                     |       |
| No                                                       | 32(86.5)  | 5(13.5)  | 1                   |       |                     |       |
| Yes                                                      | 5(13.5)   | 32(86.5) | 1(-)                | -     |                     |       |
| <b>Daily use of gloves</b>                               |           |          |                     |       |                     |       |
| No                                                       | 106(55.2) | 18(17.0) | 1                   |       |                     |       |
| Yes                                                      | 86(44.8)  | 18(20.9) | 1.29(0.63<br>-2.67) | 0.486 |                     |       |
| <b>Daily use of mask when on duty</b>                    |           |          |                     |       |                     |       |
| No                                                       | 84(43.8)  | 15(17.9) | 1                   |       |                     |       |

|                                                                      |           |          |                     |       |  |  |
|----------------------------------------------------------------------|-----------|----------|---------------------|-------|--|--|
| Yes                                                                  | 108(56.3) | 21(19.4) | 1.11(0.53<br>-2.31) | 0.78  |  |  |
| <b>Access to hand hygiene</b>                                        |           |          |                     |       |  |  |
| No                                                                   | 7(3.7)    | 2(28.6)  | 1                   |       |  |  |
| Yes                                                                  | 185(96.4) | 34(18.4) | 0.56(0.10<br>-3.02) | 0.503 |  |  |
| <b>Availability of waste management materials (All 3 waste bins)</b> |           |          |                     |       |  |  |
| No                                                                   | 8(4.2)    | 2(25.0)  | 1                   |       |  |  |
| Yes                                                                  | 184(95.8) | 34(18.5) | 0.68(0.13<br>-3.52) | 0.645 |  |  |
| <b>Proper waste segregation</b>                                      |           |          |                     |       |  |  |
| No                                                                   | 135(70.3) | 28(20.7) | 1                   |       |  |  |
| Yes                                                                  | 57(29.7)  | 8(14.0)  | 0.62(0.27<br>-1.47) | 0.28  |  |  |
| <b>Waste disposal Method (Incineration)</b>                          |           |          |                     |       |  |  |
| No                                                                   | 63(32.8)  | 10(15.9) | 1                   |       |  |  |
| Yes                                                                  | 129(67.2) | 26(20.2) | 1.34(0.60<br>-2.98) | 0.476 |  |  |

196 Values are presented as number (%); OR, odds ratio; aOR, adjusted odds ratio; 95% CI,  
197 confidence interval.

198

199

200

201

202

203

204

205

206

207

208

209

210



211 **Factors associated with lifetime exposure to HBV infection among HCW in Kisumu**  
212 **County, 2020.**

213 In logistic regression analysis Table 4, HCW who received a single dose of HBV vaccination  
214 had increased likelihood of lifetime exposure to HBV infection compared to HCW without  
215 history of vaccination (aOR, 6.25; 95% CI, 1.29-30.30, p-value<0.05). Conversely, HCW who  
216 reported receiving  $\geq 2$  doses of HBV vaccination had reduced likelihood of lifetime exposure  
217 to HBV infection compared to those without HBV vaccination (aOR, 0.03; 95% CI, 0.01-0.10,  
218 p-value= <0.0001) HCW who reported having knowledge on HBsAg transmission had higher  
219 odds of lifetime exposure to HBV infection compared to their counterparts without knowledge  
220 on HBV transmission (aOR, 7.97; 95% CI, 2.10-153.39, p-value<0.01). None of the other  
221 sociodemographic characteristics were significantly associated with current infection of HBV  
222 in HCW (Table 4).

223  
224 **Table 4:** Factors associated with lifetime exposure to HBV infection among Health care  
225 workers in Kisumu County, 2020.  
226

| Characteristics            | HCW (%)   | N(%)     | OR (95%CI)       | p-value | aOR (95% CI)     | p-value |
|----------------------------|-----------|----------|------------------|---------|------------------|---------|
| <b>Sex</b>                 |           |          |                  |         |                  |         |
| Female                     | 92(47.9)  | 40(43.5) | 1                |         |                  |         |
| Male                       | 100(52.1) | 46(46.0) | 1.11(0.63-1.96)  | 0.726   |                  |         |
| <b>Age</b>                 |           |          |                  |         |                  |         |
| 20-29                      | 65(33.9)  | 25(38.5) | 1                |         | 1                |         |
| 30-39                      | 83(43.2)  | 35(42.2) | 1.17(0.60-2.26)  | 0.649   | 1.18(0.37-3.77)  | 0.784   |
| 40-49                      | 23(12.0)  | 14(60.9) | 2.49(0.94-6.60)  | 0.067   | 1.77(0.28-11.37) | 0.547   |
| 50-59                      | 18(9.4)   | 10(55.6) | 2.00(0.70-5.75)  | 0.198   | 3.41(0.33-34.81) | 0.301   |
| $\geq 60$                  | 3(1.6)    | 2(66.7)  | 3.2(0.28-37.15)  | 0.352   | 0.27(0.01-7.98)  | 0.452   |
| <b>Marital status</b>      |           |          |                  |         |                  |         |
| Single                     | 37(19.3)  | 15(40.5) | 1                |         |                  |         |
| Married                    | 151(78.7) | 69(45.7) | 1.23(0.59-2.56)  | 0.572   |                  |         |
| Widowed/Separated/Divorced | 4(2.1)    | 2(50.0)  | 1.47(0.19-11.59) | 0.716   |                  |         |

|                                        |           |          |                |              |                  |        |
|----------------------------------------|-----------|----------|----------------|--------------|------------------|--------|
| <b>Year of service</b>                 |           |          |                |              |                  |        |
| Less than 1 year                       | 8(4.2)    | 6(75.0)  | 1              |              | 1                |        |
| 1-5 years                              | 85(44.3)  | 31(36.5) | 0.19(0.04)     | <b>0.051</b> | 0.13(0.01-2.79)  | 0.193  |
| 6-10 years                             | 51(26.6)  | 26(51.0) | 0.35(0.06)     | 0.22         | 0.57(0.02-15.34) | 0.741  |
| More than 10 years                     | 48(25.0)  | 23(47.9) | 0.31(0.06)     | 0.172        | 0.31(0.01-9.82)  | 0.509  |
|                                        |           |          |                |              |                  |        |
| <b>Carder</b>                          |           |          |                |              |                  |        |
| Doctors                                | 8(4.2)    | 3(37.5)  | 1              |              | 1                |        |
| Clinical Officer                       | 29(15.1)  | 14(48.3) | 1.56(0.31)     | 0.59         | 0.72(0.05-10.26) | 0.811  |
| Nursing officer                        | 39(20.3)  | 15(38.5) | 1.04(0.22)     | 0.959        | 0.49(0.04-6.59)  | 0.589  |
| Laboratory technologist                | 55(28.7)  | 18(32.7) | 0.81(0.17)     | 0.789        | 0.47(0.05-4.87)  | 0.527  |
| Mortuary attendance                    | 7(3.7)    | 4(57.1)  | 2.22(0.28)     | 0.45         | 0.39(0.02-8.56)  | 0.578  |
| HTS counsellor                         | 17(9.9)   | 8(47.1)  | 1.48(0.27)     | 0.654        | 0.73(0.05-9.71)  | 0.811  |
| Waste handlers                         | 37(19.3)  | 24(64.9) | 3.08(0.63)     | 0.164        | 2.00(0.17-22.84) | 0.578  |
|                                        |           |          |                |              |                  |        |
| <b>HBV Vaccine uptake</b>              |           |          |                |              |                  |        |
| Not vaccinated                         | 78(40.6)  | 52(66.7) | 1              |              | 1                |        |
| 1 dose                                 | 30(15.6)  | 25(83.3) | 2.5(0.86-7.28) | 0.093        | 6.25(1.29-30.30) | 0.023  |
| ≥2 doses                               | 84(43.8)  | 9(10.7)  | 0.06(0.03)     | <0.000       | 0.03(0.01-0.10)  | <0.000 |
|                                        |           |          |                | 1            |                  | 1      |
| <b>History of exposure</b>             |           |          |                |              |                  |        |
| Needle Stick Injury                    | 91(47.4)  | 37(40.7) | 1              |              | 1                |        |
| Contact Exposure                       | 11(5.7)   | 2(18.2)  | 0.32(0.07)     | 0.165        | 0.10(0.01-1.40)  | 0.087  |
| No Known Exposure                      | 90(46.9)  | 47(52.2) | 1.59(0.89)     | 0.12         | 3.55(1.34-9.43)  | 0.011  |
|                                        |           |          |                |              |                  |        |
| <b>Blood transfusion</b>               |           |          |                |              |                  |        |
| No                                     | 189(98.4) | 85(45.0) | 1              |              |                  |        |
| Yes                                    | 3(1.6)    | 1(33.3)  | 0.61(0.05)     | 0.69         | -6.86)           |        |
|                                        |           |          |                |              |                  |        |
| <b>Knowledge on HBsAg Transmission</b> |           |          |                |              |                  |        |
| No                                     | 83(43.2)  | 43(51.8) | 1              |              | 1                |        |

|                                                          |           |          |                 |       |                    |       |
|----------------------------------------------------------|-----------|----------|-----------------|-------|--------------------|-------|
| Yes                                                      | 109(56.8) | 43(39.5) | 0.61(0.34-1.08) | 0.089 | 17.97(2.10-153.39) | 0.008 |
| <b>Knowledge on HBsAg Prevention and control</b>         |           |          |                 |       |                    |       |
| No                                                       | 89(46.4)  | 46(51.7) | 1               |       | 1                  |       |
| Yes                                                      | 103(53.7) | 40(38.8) | 0.59(0.33-1.05) | 0.075 | 0.34(0.06-2.12)    | 0.25  |
| <b>Training on PPE full module</b>                       |           |          |                 |       |                    |       |
| No                                                       | 141(26.6) | 65(46.1) | 1               |       |                    |       |
| Yes                                                      | 51(73.4)  | 21(41.2) | 0.82(0.43-1.57) | 0.545 |                    |       |
| <b>Training on infectious agent on waste full module</b> |           |          |                 |       |                    |       |
| No                                                       | 130(67.7) | 64(49.2) | 1               |       | 1                  |       |
| Yes                                                      | 62(32.3)  | 22(35.5) | 0.57(0.30-1.06) | 0.075 | 0.65(0.10-4.21)    | 0.652 |
| <b>Training on waste management full module</b>          |           |          |                 |       |                    |       |
| No                                                       | 134(69.8) | 65(48.5) | 1               |       | 1                  |       |
| Yes                                                      | 58(30.2)  | 21(36.2) | 0.60(0.32-1.14) | 0.117 | 2.37(0.32-17.28)   | 0.395 |
| <b>Knowledge on waste disposal</b>                       |           |          |                 |       |                    |       |
| No                                                       | 90(46.9)  | 47(52.2) | 1               |       | 1                  |       |
| Yes                                                      | 102(53.1) | 39(38.2) | 0.57(0.32-1.01) | 0.053 | 0.41(0.11-1.47)    | 0.17  |
| <b>Availability of PPEs</b>                              |           |          |                 |       |                    |       |
| No                                                       | 18(9.4)   | 7(38.9)  | 1               |       |                    |       |
| Yes                                                      | 174(90.6) | 79(45.4) | 1.31(0.48-3.53) | 0.598 |                    |       |
| <b>Adequacy of PPEs</b>                                  |           |          |                 |       |                    |       |
| No                                                       | 149(77.6) | 74(49.7) | 1               |       | 1                  |       |
| Yes                                                      | 43(22.4)  | 12(27.9) | 0.39(0.19-0.82) | 0.013 | 0.49(0.16-1.56)    | 0.228 |
| <b>Daily use of apron/Dust coat</b>                      |           |          |                 |       |                    |       |
| No                                                       | 67(34.9)  | 37(55.2) | 1               |       | 1                  |       |

|                                                                      |           |          |                 |       |                 |       |
|----------------------------------------------------------------------|-----------|----------|-----------------|-------|-----------------|-------|
| Yes                                                                  | 125(65.1) | 49(39.2) | 0.52(0.29-0.95) | 0.034 | 0.73(0.26-2.03) | 0.549 |
| <b>Daily use of gumboots (Waste handlers only)</b>                   |           |          |                 |       |                 |       |
| No                                                                   | 32(86.5)  | 22(68.8) | 1               |       |                 |       |
| Yes                                                                  | 5(13.5)   | 2(8.3)   | 0.82(0.13-5.01) | 0.827 |                 |       |
| <b>Daily use of gloves</b>                                           |           |          |                 |       |                 |       |
| No                                                                   | 106(55.2) | 56(52.8) | 1               |       | 1               |       |
| Yes                                                                  | 86(44.8)  | 30(34.9) | 0.48(0.27-0.86) | 0.013 | 0.40(0.16-1.01) | 0.052 |
| <b>Daily use of mask when on duty</b>                                |           |          |                 |       |                 |       |
| No                                                                   | 84(43.8)  | 40(47.6) | 1               |       |                 |       |
| Yes                                                                  | 108(56.3) | 46(42.6) | 0.82(0.56-1.45) | 0.487 |                 |       |
| <b>Access to hand hygiene</b>                                        |           |          |                 |       |                 |       |
| No                                                                   | 7(3.7)    | 3(42.9)  | 1               |       |                 |       |
| Yes                                                                  | 185(96.4) | 83(44.9) | 1.08(0.24-4.98) | 0.917 |                 |       |
| <b>Availability of waste management materials (All 3 waste bins)</b> |           |          |                 |       |                 |       |
| No                                                                   | 8(4.2)    | 4(50.0)  | 1               |       |                 |       |
| Yes                                                                  | 184(95.8) | 82(44.6) | 0.80(0.20-3.31) | 0.763 |                 |       |
| <b>Proper waste segregation</b>                                      |           |          |                 |       |                 |       |
| No                                                                   | 135(70.3) | 66(48.9) | 1               |       | 1               |       |
| Yes                                                                  | 57(29.7)  | 20(35.1) | 0.57(0.30-1.07) | 0.081 | 0.94(0.28-3.19) | 0.991 |
| <b>Waste disposal Method (Incineration)</b>                          |           |          |                 |       |                 |       |
| No                                                                   | 63(32.8)  | 28(44.4) | 1               |       |                 |       |
| Yes                                                                  | 129(67.2) | 58(45.0) | 1.02(0.56-1.87) | 0.946 |                 |       |

227  
228 Values are presented as number (%); OR odds ratio; aOR, adjusted odds ratio; CI, confidence  
229 interval.

230

231

## 232 Discussion

233 Indeed the burden of Hospital acquired infection like Hepatitis B infection is high in developing  
234 sub-Saharan African countries like Kenya (13). Despite the availability of guidelines and  
235 treatment options, occupational risks related to hepatitis virus exposure is still a major concern  
236 for those who handle hospital waste like health care workers (14). This study documented high  
237 prevalence and lifetime exposure to HBV infection in Kisumu county, Kenya at 18.8% and  
238 44.8% respectively, the subpopulations with the highest HBV infection are: HCW who had  
239 worked for less than 1 year at 37.5%, HBV unvaccinated HCW at 35.9%, HCW with previous  
240 history of blood transfusion at 33.3% and HIV testing counselor at 29.4%. The HBV  
241 prevalence among HCW in this study is higher compared to 2.7% prevalence in general  
242 population(15). This prevalence is higher than what was found in other studies both in Kenya  
243 and Africa : pooled prevalence in Africa 6.8%, Kenya 4.0 %, southern Ethiopia 1.3%, north  
244 west Ethiopia 6.0 %, Tripoli Libya 2.3% and 6.3% in Addis Ababa, (2-5, 14, 16). A study in  
245 Kisumu, Siaya and Homabay county found that the prevalence of HBV among adolescent was  
246 3.4% while dual infection of HBV and HIV in Kisumu county hospital, one of our study site  
247 was 47% among patient presenting with jaundice in the clinic (17, 18). The high prevalence in  
248 this study could be attributed to increased HBV infection risk of exposure on HCW as  
249 highlighted in this study where 53.7% of HCW has had either needle stick or contact exposure,  
250 inadequate trainings, observed knowledge gaps, poor infection prevention infrastructure, low  
251 Hepatitis B virus vaccine coverage and low-adherence universal infection prevention and  
252 control measures (consistent use of PPE, proper waste segregation and disposal) as shown in  
253 table 1. Low training coverage on waste management, infectious agent on waste and  
254 inadequacy of PPE at 30.2%, 32.2%, 22.4% respectively could be the cause to high needle stick  
255 injury, contact exposure and poor adherence to standard precautions. The findings on  
256 inadequate HCW capacity building, poor adherence on IPC standard and additional precautions  
257 are in concurrence with other studies which pointed to poor waste management and lack of  
258 training and capacity building to staff (16, 19, 20). Health care system administrators should  
259 ensure adequate PPEs are available, accessible and properly used by HCW, IPC trainings  
260 should be done to all health care workers with provision of annual refresher.

261 Hepatitis B surface antibody (anti-HBs) prevalence in this study was 63.0%, these were HCW  
262 who have recovered from infection or immunised HBV. Anti HBS positivity was highest in  
263 laboratory technologists 74.6%, clinical officers 65.5%, and Nursing officers 64.1%.  
264 Laboratory technologists were the highest immunized carder, this may be attributed to the

265 implementation of laboratory quality management system and international organization for  
266 standardization ISO 15189 which required that all laboratory personnel must be vaccinated  
267 against blood borne pathogens (21). The low HBV immunity rate and non-completion of  
268 vaccine doses is comparable to prior studies done in the region showing low HBV vaccine  
269 uptake and non-completion of vaccine doses(2, 16). The benefit vaccination as HBV infection  
270 prevention measure has been documented, this study also found HCW who are fully vaccinated  
271 had no lifetime exposure while unvaccinated HCW had highest 61% lifetime exposure to HBV  
272 infection (22). Findings in this study highlights the need to capacity build HCW on the benefits  
273 of getting full vaccine dose and need to avail the vaccine for all health care workforce. .  
274 significant risk of lifetime exposure to HBV infection was noted among HCW with one vaccine  
275 dose, those with no known exposure and highest in those who had Knowledge on HBsAg  
276 transmission while significant HBV protection was seen in HCW who had adequate PPE and  
277 those using gloves and dust coat consistently. A study in Southern Ethiopia found HBV  
278 lifetime exposure was higher in MWH older than 40 years(2) while population based Azar  
279 cohort study found that all age groups were exposed to HBV. In Eastern Ethiopia, there was  
280 higher prevalence of HBV infection in trainees. (23, 24). There is need to have remedial  
281 measures that is aimed at reducing this high lifetime exposure rates by capacity building HCW,  
282 availing proper infrastructure for infection prevention and control, strengthening HBV  
283 vaccination and proper surveillance for HAI in all healthcare settings. Policy should be revised  
284 to enforce mandatory HAI pre-employment screening and vaccination for personnel working  
285 in healthcare settings.

286 **Limitations** for this study were that this was done during COVID 19 outbreak period when  
287 there was a lot of focus on infection prevention to mitigate COVID 19 infections, in as much  
288 as this may have influenced the findings on the compliance with standard precautions, it  
289 strengthened the adherence to standard infection prevention measures. Also, during this  
290 COVID 19 period the government issued recommendations that elderly populations and those  
291 with comorbidities should work from home so we may have missed some eligible health care  
292 workers at the facilities. The study was conducted in nine highest volume government  
293 hospitals, these hospitals have the highest workload, produce the largest volume wastes, and  
294 have highest number of health care workers. We did not focus on lower level , private and  
295 faith-based health facilities where the situation could be worse or better. We only assessed  
296 HBV exposures that are related to health care settings therefore the generalizability is limited  
297 to health facility related exposures. Health care workers are not done for thorough pre-

298 employment medical examination so it's difficult to point if the infections observed in this  
299 study occurred before or after employment.

## 300 **Conclusion**

301 The prevalence of HBV infections among HCW is about 6 and 5-fold higher than general  
302 population and adolescent blood donors respectively, this high prevalence needs multi  
303 stakeholder approach to address. There was suboptimal training on waste management,  
304 infectious agent on waste and PPE coupled with PPE inadequacy that could lead to high needle  
305 stick injury poor adherence to universal/standard precautions.

306 There is need to ensure that adequate PPEs is available for HCW usage, trainings done to health  
307 care workers on infection prevention and control.

308 From the study there was low uptake of HBV vaccination with HCW immunised either due to  
309 vaccination or infection at 36.7 %, data also showed that there is significant relationship  
310 between immunization status and positivity for HBV, the high lifetime exposure may be due  
311 to high exposure to infections and low vaccination rates for personnel working in healthcare  
312 settings. Policy should be revised to make it mandatory for pre-employment HBV vaccination  
313 for most at risk populations like HCW and MWH.

314 No significant association was observed between HBV exposure and factors such as a history  
315 of exposure, blood transfusion, use of PPE, Knowledge on HBsAg (transmission,  
316 pathogenicity, treatment, prevention & control), training on (PPE, infectious agent, waste  
317 management). None of the sociodemographic characteristics plus other factors such as carder  
318 and departments were significantly associated with HBV exposure status for health care  
319 workers.. There is need for proper surveillance for HAI in all healthcare settings.

## 320 **Recommendation**

321 There should be continuous training of HCW on universal precaution of infection prevention  
322 measures. There is need to increase HBV vaccine coverage and improve HBV surveillance  
323 among HCW.

324

325

326

## 327 **Acknowledgements**

328 We acknowledge the county Government of Kisumu, each hospital's medical superintendent  
329 and management for allowing us to do this study. We are also grateful to Kenya medical  
330 research institute, Center for Global HIV research, Human immunodeficiency Virus Research  
331 Laboratory (KEMRI,CGHR, HIV-R Laboratory ) for performing the laboratory tests for the  
332 study.

333 We sincerely thank the data collectors and laboratory Scientists of each hospital for their  
334 assistance in data and sample collection.

335 We thank and appreciate the study subjects who volunteered to participate in this study.

336 Lastly, we wish to appreciate and thank of Jaramogi Oginga Odinga University of Science

337 And Technology for their mentor and support in designing and conducting the study.



## References

1. WHO. Global Hepatitis Report 2017\_Geneva\_World Health Organization\_2017..pdf. 2017.
2. Amsalu A, Worku M, Tadesse E, Shimelis T. The exposure rate to hepatitis B and C viruses among medical waste handlers in three government hospitals, southern Ethiopia. *Epidemiol Health*. 2016;38:e2016001.
3. Anagaw B, Shiferaw Y, Anagaw B, Belyhun Y, Erku W, Biadgelegn F, et al. Seroprevalence of hepatitis B and C viruses among medical waste handlers at Gondar town Health institutions, Northwest Ethiopia. *BMC research notes*. 2012;5:55.
4. Franka E, El-Zoka AH, Hussein AH, Elbakosh MM, Arafa AK, Ghenghesh KS. Hepatitis B virus and hepatitis C virus in medical waste handlers in Tripoli, Libya. *J Hosp Infect*. 2009;72(3):258-61.
5. Atlaw D, Sahiledengle B, Tariku Z. Hepatitis B and C virus infection among healthcare workers in Africa: a systematic review and meta-analysis. *Environ Health Prev Med*. 2021;26(1):61.
6. Kisangau EN, Awour A, Juma B, Odhiambo D, Muasya T, Kii SN, et al. Prevalence of hepatitis B virus infection and uptake of hepatitis B vaccine among healthcare workers, Makueni County, Kenya 2017. *Journal of public health*. 2018.
7. W.H.O. Progress report on HIV, viral hepatitis and sexually transmitted infections. Accountability for the global health sector strategies, 2016–2021. Geneva, World Health Organization; 2019. Contract No.: CC BY-NC-SA 3.0 IGO.
8. WHO. Progress report on HIV, viral hepatitis and sexually transmitted infections 2019. 2019.
9. WHO. Global Health sector strategy on Viral Hepatitis 2016-2021: Towards Ending Viral Hepatitis. 2016.
10. Lok AS, McMahon BJ. Chronic hepatitis B. *Hepatology*. 2007;45(2):507-39.
11. Reynolds K, Thomas M, Dougan M. Diagnosis and Management of Hepatitis in Patients on Checkpoint Blockade. *Oncologist*. 2018;23(9):991-7.
12. Chartier Y, Emmanuel J, Pieper U, Prüss A, Rushbrook P, Stringer R, et al. WHO Library Cataloguing-in-Publication Data\_Safe management of wastes from health\_care activities \_edited by Y. Chartier et al. \_2nd ed..pdf. 2014.
13. Allegranzi B, Bagheri Nejad S, Combescure C, Graafmans W, Attar H, Donaldson L, et al. Burden of endemic health-care-associated infection in developing countries: systematic review and meta-analysis. *Lancet*. 2011;377(9761):228-41.
14. Shiferaw Y, Abebe T, Mihret A. Hepatitis B virus infection among medical waste handlers in Addis Ababa, Ethiopia. *BMC research notes*. 2011;4:479.
15. Ly KN, Kim AA, Umuro M, Drobenuic J, Williamson JM, Montgomery JM, et al. Prevalence of Hepatitis B Virus Infection in Kenya, 2007. *Am J Trop Med Hyg*. 2016;95(2):348-53.
16. Kisangau EN, Awour A, Juma B, Odhiambo D, Muasya T, Kii SN, et al. Prevalence of hepatitis B virus infection and uptake of hepatitis B vaccine among healthcare workers, Makueni County, Kenya 2017. *J Public Health (Oxf)*. 2019;41(4):765-71.
17. Otedo AE. HBV, HIV co-infection at Kisumu District Hospital, Kenya. *East Afr Med J*. 2004;81(12):626-30.
18. Awili HO, Gitao GC, Muchemi GM. Seroprevalence and Risk Factors for Hepatitis B Virus Infection in Adolescent Blood Donors within Selected Counties of Western Kenya. *Biomed Res Int*. 2020;2020:8578172.
19. Zhu S, Kahsay KM, Gui L. Knowledge, Attitudes and Practices related to standard precautions among nurses: A comparative study. *J Clin Nurs*. 2019;28(19-20):3538-46.
20. Sapkota B, Gupta GK, Mainali D. Impact of intervention on healthcare waste management practices in a tertiary care governmental hospital of Nepal. *BMC Public Health*. 2014;14:1005.
21. Aoyagi T. [ISO 15189 medical laboratory accreditation]. *Rinsho Byori*. 2004;52(10):860-5.
22. Mast EE, Margolis HS, Fiore AE, Brink EW, Goldstein ST, Wang SA, et al. A comprehensive immunization strategy to eliminate transmission of hepatitis B virus infection in the United States:

recommendations of the Advisory Committee on Immunization Practices (ACIP) part 1: immunization of infants, children, and adolescents. *MMWR Recomm Rep.* 2005;54(RR-16):1-31.

23. Tesfa T, Hawulte B, Tolera A, Abate D. Hepatitis B virus infection and associated risk factors among medical students in eastern Ethiopia. *PLoS One.* 2021;16(2):e0247267.

24. Pouri AA, Ghojazadeh M, Shirmohammadi M, Eftekhar-Sadat AT, Somi MH. Seroepidemiology and Risk Factors of Hepatitis B Virus Infection: A Population-Based Azar Cohort Study. *Iran J Public Health.* 2020;49(11):2152-60.
